# Supplementary material
Source: PubMed Central journal article supplement (PMC5642933)
Supplement: NIHMS870650-supplement-supplement_1.pdf [file NIHMS870650-supplement-supplement_1.pdf]

## Supplementary Information

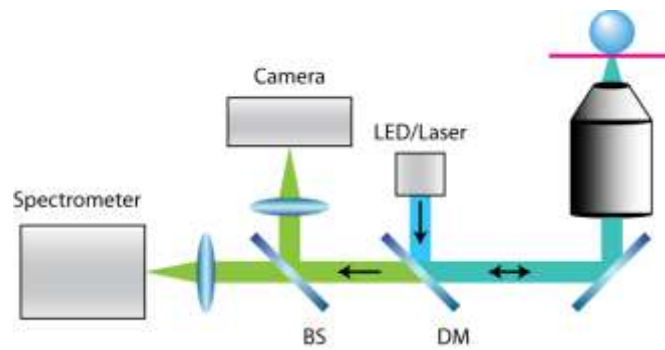

Fig. S1. Optical setup. An inverted microscope is used to image, excite and collect light from the sample. For the bioluminescence experiments the LED/laser source and dichroic mirror (DM) are removed.

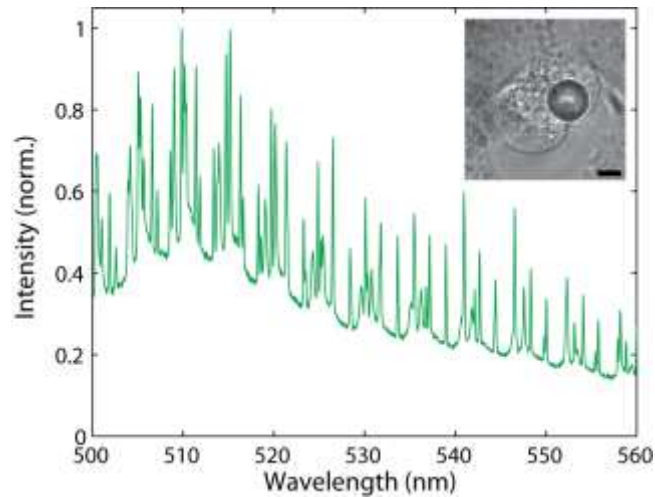

Fig. S2. Spectrum from bead in a cell. WGMs in the spectra of a GFP coated  $\text{BaTiO}_3$  bead in a HeLa cell undergoing cellular division (in Fig. 2). Scale bar, 5  $\mu\text{m}$ .

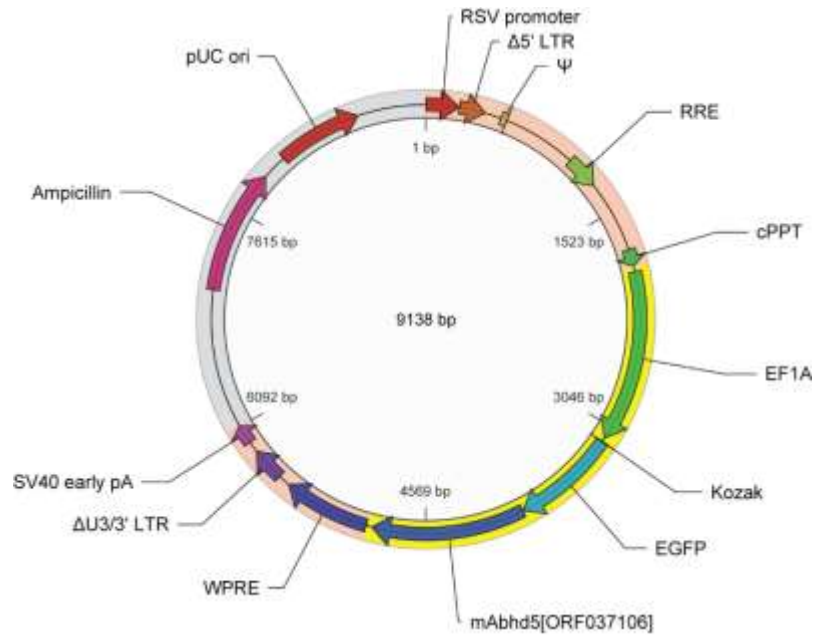

Fig. S3. GFP-ABHD5. A genetic map of the vector used in the transduction of 3T3-L1 adipocytes.

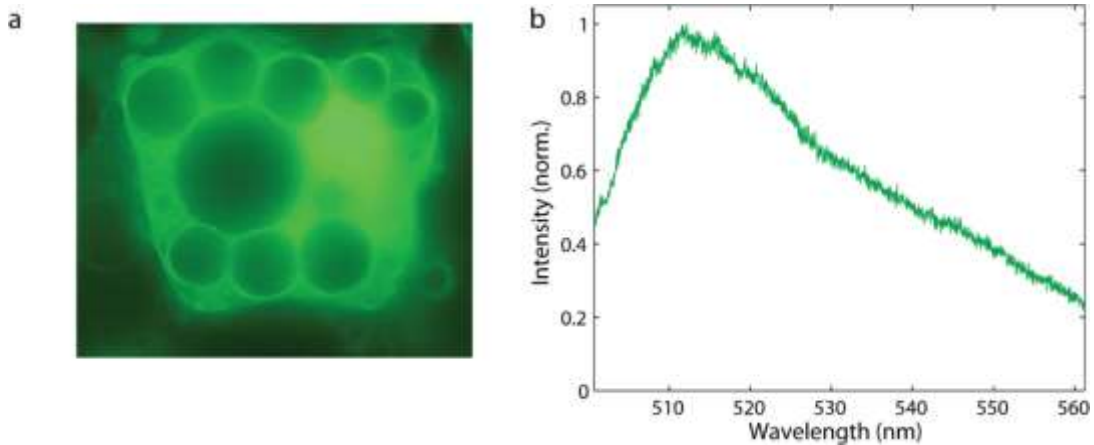

Fig. S4. Fluorescence of a GFP-transduced adipocyte, without ABHD5. (a) A typical fluorescent image showing bright emission from the cytoplasm, whereas fluorescence in adipocytes transfected with GFP-ABHD5 were more predominantly produced at the surface of lipid droplets (Fig. 4b). (b) A typical emission spectrum showing broad spontaneous emission from the GFP and no apparent spectral features associated with the WGMs of lipid droplets.

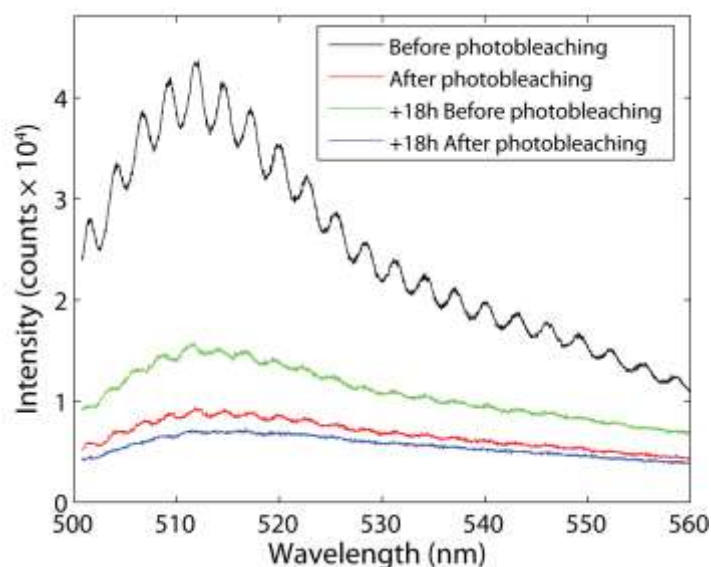

Fig. S5. Time-lapse spectra showing the photobleaching and recovery of GFP fluorescence from a GFP-ABHD5-transfected adipocyte (in Fig. 4c).

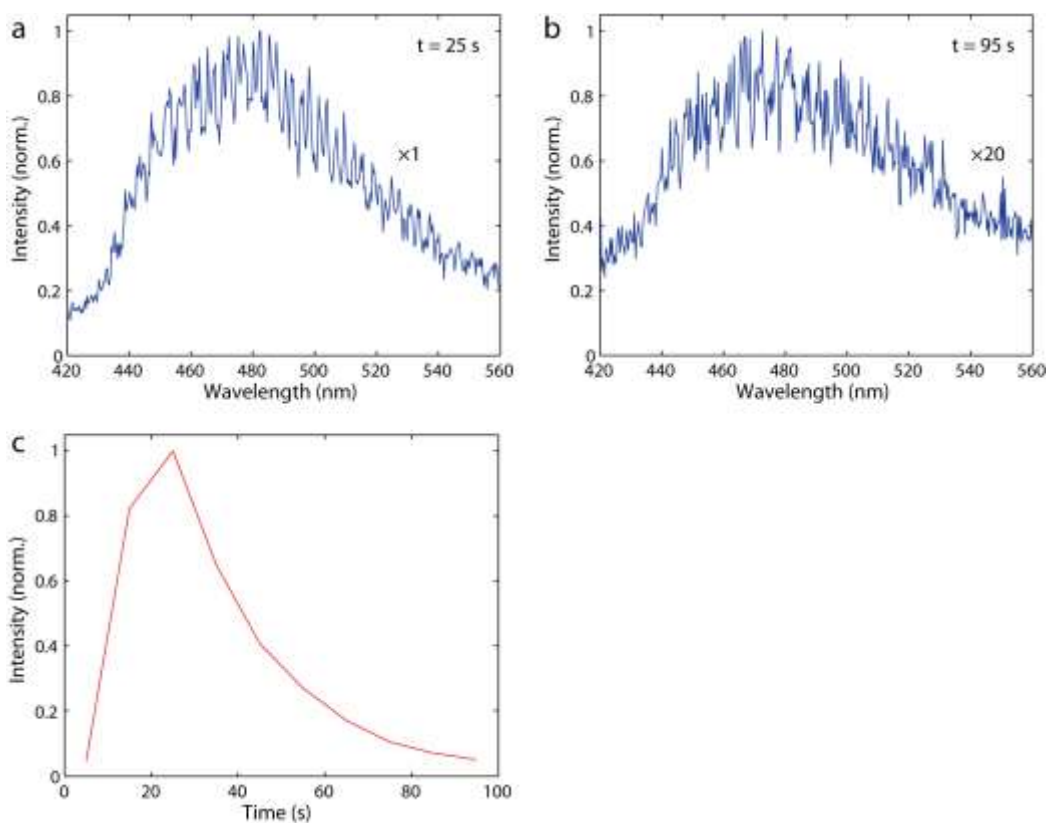

Fig. S6. Cavity-modified bioluminescence. (a,b) Spectra of light emitted by the bead in Fig. 4 at 25 s after the addition of luciferin when the light output is at maximum, (a), and after 95 s, (b). (c) Time trace of the bioluminescence intensity after CTZ was added to the beads at  $t = 0$ . The total intensity initially increases and then decreases exponentially.

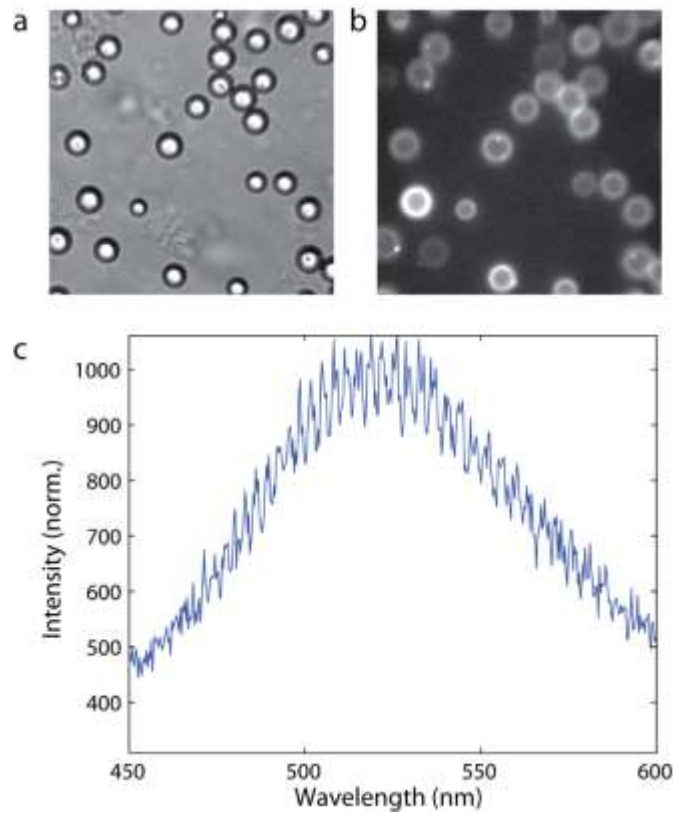

Fig. S7. RLuc8.6-coated glass beads. (a) Bright-field image of soda lime glass beads with diameters ranging from 15 to 19  $\mu\text{m}$  (Cospheric). The beads were functionalized according to a protocol described by Ribeiro *et al.* in “Immobilization of luciferase from a firefly lantern extract on glass strips as an alternative strategy for luminescent detection of ATP,” *J. Biolumin. Chemilumin.* **13**, 371–378, 1998. Briefly, we used 3 mg/ml Renilla luciferase (RLuc8.6) and 3 mg/ml poly-L-lysine hydrobromide (MW 30,000-70,000, Sigma) in Tris buffer (pH 7.4) and incubated beads in this solution at 4°C for 24 h. The beads were then washed five times with Tris buffer and transferred to PBS. (b) Bioluminescent image of the beads. (c) Spectrum of light from a single bead. WGM spectral peaks are visible.

### GFP-ABHD5 vector sequence used in the transduction of 3T3-L1 adipocytes

1 AATGTAGTCT TATGCAATAC TCTTGTAGTC TTGCAACATG GTAACGATGA GTTAGCAACA  
61 TGCCTTACAA GGAGAGAAAA AGCACCGTGC ATGCCGATTG GTGGAAGTAA GGTGGTACGA  
121 TCGTGCCTTA TTAGGAAGGC AACAGACGGG TCTGACATGG ATTGGACGAA CCACTGAATT  
181 GCCGCATTGC AGAGATATTG TATTTAAGTG CCTAGCTCGA TACATAAACG GGTCTCTCTG  
241 GTTAGACCAG ATCTGAGCCT GGGAGCTCTC TGGCTAACTA GGAACCCAC TGCTTAAGCC  
301 TCAATAAAGC TTGCCTTGAG TGCTTCAAGT AGTGTGTGCC CGTCTGTTGT GTGACTCTGG  
361 TAACTAGAGA TCCCTCAGAC CCTTTTAGTC AGTGTGAAAA ATCTCTAGCA GTGGCGCCCG  
421 AACAGGGACT TGAAAGCGAA AGGGAAACCA GAGGAGCTCT CTCGACGCAG GACTCGGCTT  
481 GCTGAAGCGC GCACGGCAAG AGGCGAGGGG CGGCGACTGG TGAGTACGCC AAAAATTTTG  
541 ACTAGCGGAG GCTAGAAGGA GAGAGATGGG TGCAGAGCGC TCAGTATTAA GCGGGGGAGA  
601 ATTAGATCGC GATGGGAAAA AATTCGGTTA AGGCCAGGGG GAAAGAAAAA ATATAAATTA  
661 AAACATATAG TATGGGCAAG CAGGGAGCTA GAACGATTCG CAGTTAATCC TGGCCTGTTA  
721 GAAACATCAG AAGGCTGTAG ACAAATACTG GGACAGCTAC AACCATCCCT TCAGACAGGA  
781 TCAGAAGAAC TTAGATCATT ATATAATACA GTAGCAACCC TCTATTGTGT GCATCAAAGG  
841 ATAGAGATAA AAGACACCAA GGAAGCTTTA GACAAGATAG AGGAAGAGCA AAACAAAAGT  
901 AAGACCACCG CACAGCAAGC GGCCGCTGAT CTTCAGACCT GGAGGAGGAG ATATGAGGGA  
961 CAATTGGAGA AGTGAATTAT ATAAATATAA AGTAGTAAAA ATTGAACCAT TAGGAGTAGC  
1021 ACCCACCAAG GCAAAGAGAA GAGTGGTGCA GAGAGAAAAA AGAGCAGTGG GAATAGGAGC  
1081 TTTGTTCCCT GGGTTCCTTG GAGCAGCAGG AAGCACTATG GGCGCAGCGT CAATGACGCT  
1141 GACGGTACAG GCCAGACAAT TATTGTCTGG TATAGTGCAG CAGCAGAACA ATTTGCTGAG  
1201 GGCTATTGAG GCGCAACAGC ATCTGTTGCA ACTCACAGTC TGGGGCATCA AGCAGCTCCA  
1261 GGCAAGAATC CTGGCTGTGG AAAGATACCT AAAGGATCAA CAGTCTCTGG GGATTTGGGG  
1321 TTGCTCTGGA AAATCATTG GCACCACTGC TGTGCCTTGG AATGCTAGTT GGAGTAATAA  
1381 ATCTCTGGAA CAGATTTGGA ATCACACGAC CTGGATGGAG TGGGACAGAG AAATTAACAA  
1441 TTACACAAGC TTAATACACT CCTTAATTGA AGAATCGCAA AACCAGCAAG AAAAGAATGA  
1501 ACAAGAATTA TTGGAATTAG ATAAATGGGC AAGTTTGTGG AATTGGTTTA ACATAACAAA  
1561 TTGGCTGTGG TATATAAAAT TATTCATAAT GATAGTAGGA GGCTTGGTAG GTTTAAGAAT  
1621 AGTTTTTGCT GTACTTTCTA TAGTGAATAG AGTTAGGCAG GGATATTCAC CATTATCGTT  
1681 TCAGACCCAC CTCCCAACCC CGAGGGGACC CGACAGGCCG GAAGGAATAG AAGAAGAAGG  
1741 TGGAGAGAGA GACAGAGACA GATCCATTCT ATTAGTGAAC GGATCTCGAC GGTATCGCTA  
1801 GCTTTTAAAA GAAAAGGGGG GATTGGGGGG TACAGTGCAG GGGAAAGAAT AGTAGACATA  
1861 ATAGCAACAG ACATACAAAC TAAAGAATTA CAAAACAAA TTACAAAAAT TCAAATTTT  
1921 ACTAGTGATT ATCGGATCAA CTTTGTATAG AAAAGTTGGG CTCCGGTGCC CGTCAGTGGG  
1981 CAGAGCGCAC ATCGCCACA GTCCCCGAGA AGTTGGGGGG AGGGGTCCGC AATTGAACCG  
2041 GTGCCTAGAG AAGGTGGCGC GGGGTAAACT GGGAAAGTGA TGTCGTGTAC TGGCTCCGCC  
2101 TTTTCCCGA GGGTGGGGGA GAACCGTATA TAAGTGCAGT AGTCGCCGTG AACGTTCTTT  
2161 TTCGCAACGG GTTTGCCGCC AGAACACAGG TAAGTGCCGT GTGTGGTTCC CGCGGGCCTG  
2221 GCCTCTTTAC GGGTTATGGC CCTTGCCTGC CTTGAATTAC TTCCACCTGG CTGCAGTACG  
2281 TGATTCTTGA TCCCGAGCTT CGGGTTGGAA GTGGGTGGGA GAGTTCGAGG CTTGCGCTT  
2341 AAGGAGCCCC TTCGCCTCGT GCTTGAGTTG AGGCCTGGCC TGGGCGCTGG GGCCGCCCGC  
2401 TGCGAATCTG GTGGCACCTT CGCGCCTGTC TCGCTGCTTT CGATAAGTCT CTAGCCATTT  
2461 AAAATTTTTG ATGACCTGCT GCGACGCTTT TTTTCTGGCA AGATAGTCTT GTAAATGCGG  
2521 GCCAAGATCT GCACACTGGT ATTTCCGTTT TTGGGGCCGC GGGCGCGAC GGGGCCCGTG  
2581 CGTCCCAGCG CACATGTTCT GCGAGGCGGG CCTGCGAGC GCGCCACCG AGAATCGGAC  
2641 GGGGGTAGTC TCAAGCTGGC CGGCCTGCTC TGGTGCCTGG TCTCGCGCCG CCGTGTATCG  
2701 CCCCGCCCTG GCGGCAAGG CTGGCCCGGT CGGCACCAGT TCGGTGAGCG GAAAGATGGC  
2761 CGCTTCCCGG CCCTGCTGCA GGGAGCTCAA AATGGAGGAC GCGGCGCTCG GGAGAGCGGG  
2821 CGGGTGAGTC ACCCACACAA AGGAAAAGGG CCTTCCGTC CTCAGCCGTC GCTTCATGTG  
2881 ACTCCACGGA GTACCGGGCG CCGTCCAGGC ACCTCGATTA GTTCTCGAGC TTTTGGAGTA  
2941 CGTCGTCTTT AGGTTGGGGG GAGGGGTTTT ATGCGATGGA GTTCCCCAC ACTGAGTGGG  
3001 TGGAGACTGA AGTTAGGCCA GCTTGGCACT TGATGTAATT CTCCTTGGA TTTGCCCTTT  
3061 TTGAGTTTGG ATCTTGGTTC ATTCTCAAGC CTCAGACAGT GGTTCAAAGT TTTTTTCTTC  
3121 CATTTACAGG GTCTGTACAA GTTTGTACAA AAAAGCAGGC TGCCACCATG GTGAGCAAGG

3181 GCGAGGAGCT GTTCACCGGG GTGGTGCCCA TCCTGGTCGA GCTGGACGGC GACGTAAACG  
3241 GCCACAAGTT CAGCGTGTCC GCGGAGGGCG AGGGCGATGC CACCTACGGC AAGCTGACCC  
3301 TGAAGTTCAT CTGCACCACC GGCAAGCTGC CCGTGCCCTG GCCACCCTC GTGACCACCC  
3361 TGACCTACGG CGTGCAGTGC TTCAGCCGCT ACCCCGACCA CATGAAGCAG CACGACTTCT  
3421 TCAAGTCCGC CATGCCCGAA GGCTACGTCC AGGAGCGCAC CATCTTCTTC AAGGACGACG  
3481 GCAACTACAA GACCCGCGCC GAGGTGAAGT TCGAGGGCGA CACCCTGGTG AACC GCATCG  
3541 AGCTGAAGGG CATCGACTTC AAGGAGGACG GCAACATCCT GGGGCACAAG CTGGAGTACA  
3601 ACTACAACAG CCACAACGTC TATATCATGG CCGACAAGCA GAAGAACGGC ATCAAGGTGA  
3661 ACTTCAAGAT CCGCCACAAC ATCGAGGACG GCAGCGTGCA GCTCGCCGAC CACTACCAGC  
3721 AGAACACCCC CATCGGCGAC GGCCCCGTGC TGCTGCCCGA CAACCACTAC CTGAGCACCC  
3781 AGTCCGCCCT GAGCAAAGAC CCCAACGAGA AGCGCGATCA CATGGTCCTG CTGGAGTTCTG  
3841 TGACCGCCGC CGGGATCACT CTCGGCATGG ACGAGCTGTA CAAGATGAAA GCGATGGCGG  
3901 CGGAGGAGGA GGTGGACTCG GCAGACGCCG GTGGAGGGTC AGGATGGCTG ACAGGGTGGC  
3961 TTCTTACCTG GTGTCCCACA TCTACATCAC ACCTTAAAGA AGCTGAAGAG AAAATGTTAA  
4021 AATGTGTCCC CTGCACTTAC AAGAAAGAGC CTGTGCGCAT ATCCAATGGA AACAGAATAT  
4081 GGACGCTGAT GTTCTCTCAC AACATTTCTA GTAAGACGCC ACTTGTCTCTC CTTCATGGTT  
4141 TTGGAGGAGG TCTTGGACTT TGGGCCCTGA ATTTTGAAGA TCTAAGCACC GATAGGCCTG  
4201 TCTATGCCTT TGACCTATTG GGCTTCGGAA GAAGTAGTAG ACCTAGGTTT GACAGTGATG  
4261 CGGAAGAAGT GGAGAATCAG TTTGTGGAAT CCATTGAAGA GTGGAGATGT GCCCTCAGGT  
4321 TGGACAAAAT GATCTTGCTT GGACACAACC TGGGAGGGTT CTGGCTGCC GCTTACTCAC  
4381 TGAAGTACCC ATCAAGGGTT AGTCACCTCA TTTTAGTAGA GCCATGGGGT TTTCTGAGC  
4441 GACCAGATCT TGCTGATCAA GAGAGACCAA TTCCAGTTTG GATCAGGGCC CTAGGGGCAG  
4501 CATTGACTCC CTTTAACCCC TTGGCTGGCC TCAGGATTGC AGGACCTTTT GGGTTAAGTC  
4561 TAGTGCAGCG TTTGAGGCCCT GATTTCAAGC GGAAGTACTC CTCTATGTTT GAAGATGACA  
4621 CGGTGACAGA GTACATCTAC CACTGTAATG TACAAACCCC AAGTGGTGAG ACAGCTTTCA  
4681 AAAACATGAC GATTCCTTAT GGGTGGGCCA AACGGCCAAT GCTTCAGCGG ATAGGTGGCT  
4741 TGCATCCTGA CATCCAGTT TCAGTGATCT TTGGAGCCCG ATCCTGCATA GATGGCAACT  
4801 CTGGAACCAG CATCCAGTCA CTGCGACCGA AGTCCTACGT GAAGACAATT GCCATCCTCG  
4861 GGGCGGGGCA TTATGTGTAT GCAGATCAGC CAGAAGAATT CAACCAGAAA GTCAAGGAGA  
4921 TCTGCCACAC AGTAGACTGA ACCCAGCTTT CTGTACAAA GTGGTGATAA TCGAATTCCG  
4981 ATAATCAACC TCTGGATTAC AAAATTTGTG AAAGATTGAC TGGTATTCTT AACTATGTTG  
5041 CTCCTTTTAC GCTATGTGGA TACGCTGCTT TAATGCCTTT GTATCATGCT ATTGCTTCCC  
5101 GTATGGCTTT CATTTTCTCC TCCTTGTATA AATCCTGGTT GCTGTCTCTT TATGAGGAGT  
5161 TGTGGCCCGT TGTCAGGCAA CGTGGCGTGG TGTGCACTGT GTTTGCTGAC GCAACCCCA  
5221 CTGGTTGGGG CATTGCCACC ACCTGTCAGC TCCTTTCCGG GACTTTCGCT TTCCCCTCC  
5281 CTATTGCCAC GCGGGAACTC ATCGCCGCTT GCCTTGCCCG CTGCTGGACA GGGGCTCGGC  
5341 TGTTGGGCAC TGACAATTCC GTGGTGTGTG CGGGGAAGCT GACGTCCTTT CCATGGCTGC  
5401 TCGCCTGTGT TGCCACCTGG ATTCTGCGCG GGACGTCCTT CTGCTACGTC CTTTCGGCCC  
5461 TCAATCCAGC GGACCTTCCT TCCCGCGGCC TGCTGCCGGC TCTGCGGCCT CTTCCGCGTC  
5521 TTCGCCTTCG CCCTCAGACG AGTCGGATCT CCCTTTGGGC CGCCTCCCCG CATCGGGAAT  
5581 TCCCGCGGTT CGCTTTAAGA CCAATGACTT ACAAGGCAGC TGTAGATCTT AGCCACTTTT  
5641 TAAAAGAAAA GGGGGGACTG GAAGGGCTAA TTCACTCCCA ACGAAGACAA GATCTGCTTT  
5701 TTGCTTGTAC TGGGTCTCTC TGGTTAGACC AGATCTGAGC CTGGGAGCTC TCTGGCTAAC  
5761 TAGGGAACCC ACTGCTTAAG CCTCAATAAA GCTTGCCCTG AGTGCTTCAA GTAGTGTGTG  
5821 CCCGCTGTGT GTGTGACTCT GGTAACTAGA GATCCCTCAG ACCTTTTAG TCAGTGTGGA  
5881 AAATCTCTAG CAGTAGTAGT TCATGTCATC TTATTATTCA GTATTTATAA CTTGCAAAGA  
5941 AATGAATATC AGAGAGTGAG AGGAACTTGT TTATTGCAGC TTATAATGGT TACAAATAAA  
6001 GCAATAGCAT CACAAATTTT ACAAATAAAG CATTTTTTTC ACTGCATTCT AGTTGTGGTT  
6061 TGTCCAAACT CATCAATGTA TCTTATCATG TCTGGCTCTA GCTATCCCGC CCCTAACTCC  
6121 GCCCATCCCG CCCCTAACTC CGCCAGTTC CGCCATTCT CCGCCCATG GCTGACTAAT  
6181 TTTTTTTATT TATGCAGAGG CCGAGGCCGC CTCGGCCTCT GAGCTATTCC AGAAGTAGTG  
6241 AGGAGGCTTT TTTGGAGGCC TAGGGACGTA CCAATTCGC CCTATAGTGA GTCGTATTAC  
6301 GCGCGCTCAC TGGCCGTCGT TTTACAACGT CGTGACTGGG AAAACCCTGG CGTTACCCAA  
6361 CTTAATCGCC TTGCAGCACA TCCCCCTTTC GCCAGCTGGC GTAATAGCGA AGAGGCCCGC  
6421 ACCGATCGCC CTTCCCAACA GTTGCAGCAG CTGAATGGCG AATGGGACGC GCCCTGTAGC  
6481 GGCGCATTAA GCGCGGCGGG TGTGGTGGTT ACGCGCAGCG TGACCGCTAC ACTTGCCAGC  
6541 GCCCTAGCGC CCGCTCCTTT CGCTTTCTTC CCTTCCTTTC TCGCCACGTT CGCCGGCTTT

6601 CCCC GTCAAG CTCTAAATCG GGGGCTCCCT TTAGGGTTCC GATTTAGTGC TTTACGGCAC  
6661 CTCGACCCCA AAAA ACTTGA TTAGGGTGAT GGTTACAGTA GTGGGCCATC GCCCTGATAG  
6721 ACGGTTTTTC GCCCTTTGAC GTTGGAGTCC ACGTTCCTTA ATAGTGGACT CTTGTTCCAA  
6781 ACTGGAACAA CACTCAACCC TATCTCGGTC TATTCTTTTG ATTTATAAGG GATTTTGCCG  
6841 ATTTGCGCCT ATTGGTTAAA AAATGAGCTG ATTTAACAAA AATTTAACGC GAATTTTAAAC  
6901 AAAATATTAA CGCTTACAAT TTAGGTGGCA CTTTTCGGGG AAATGTGCGC GGAACCCCTA  
6961 TTTGTTTATT TTTCTAAATA CATTCAAATA TGTATCCGCT CATGAGACAA TAACCCTGAT  
7021 AAATGCTTCA ATAATATTGA AAAAGGAAGA GTATGAGTAT TCAACATTTT CGTGTCGCCC  
7081 TTATTCCTT TTTTGCGGCA TTTTGCCTTC CTGTTTTTGC TCACCCAGAA ACGCTGGTGA  
7141 AAGTAAAAGA TGCTGAAGAT CAGTTGGGTG CACGAGTGGG TTACATCGAA CTGGATCTCA  
7201 ACAGCGGTAA GATCCTTGAG AGTTTTCGCC CCGAAGAACG TTTTCCAATG ATGAGCACTT  
7261 TTAAAGTTCT GCTATGTGGC GCGGTATTAT CCCGTATTGA CGCCGGGCAA GAGCAACTCG  
7321 GTCGCCGCAT AACTATTCT CAGAATGACT TGGTTGAGTA CTCACCAGTC ACAGAAAAGC  
7381 ATCTTACGGA TGGCATGACA GTAAGAGAAT TATGCAGTGC TGCCATAACC ATGAGTGATA  
7441 AACTGCGGC CAACTTACTT CTGACAACGA TCGGAGGACC GAAGGAGCTA ACCGCTTTTT  
7501 TGCACAACAT GGGGGATCAT GTA ACTCGCC TTGATCGTTG GGAACCGGAG CTGAATGAAG  
7561 CCATACCAA CGACGAGCGT GACACCACGA TGCCTGTAGC AATGGCAACA ACGTTGCGCA  
7621 AACTATTAAC TGGCGAACTA CTTACTCTAG CTTCCCGGCA ACAATTAATA GACTGGATGG  
7681 AGGCGGATAA AGTTGCAGGA CCACTTCTGC GCTCGGCCCT TCCGGCTGGC TGGTTTTATTG  
7741 CTGATAAATC TGGAGCCGGT GAGCGTGGGT CTCGCGGTAT CATTGCAGCA CTGGGGCCAG  
7801 ATGGTAAGCC CTCCCGTATC GTAGTTATCT ACACGACGGG GAGTCAGGCA ACTATGGATG  
7861 AACGAAATAG ACAGATCGCT GAGATAGGTG CCTCACTGAT TAAGCATTGG TAACTGTCAG  
7921 ACCAAGTTTA CTCATATATA CTTTAGATTG ATTTAAAAC TCATTTTTAA TTTAAAAGGA  
7981 TCTAGGTGAA GATCCTTTTT GATAATCTCA TGACCAAAT CCCTAACGT GAGTTTTCGT  
8041 TCCACTGAGC GTCAGACCCC GTAGAAAAGA TCAAAGGATC TTCTTGAGAT CTTTTTTTTC  
8101 TGCGCGTAAT CTGCTGCTTG CAAACAAAAA AACCACCGCT ACCAGCGGTG GTTTGTTTGC  
8161 CGGATCAAGA GCTACCAACT CTTTTTCCGA AGGTA ACTGG CTTCAGCAGA GCGCAGATAC  
8221 CAAATACTGT TCTTCTAGTG TAGCCGTAGT TAGGCCACCA CTTCAAGAAC TCTGTAGCAC  
8281 CGCCTACATA CCTCGCTCTG CTAATCCTGT TACCAGTGGC TGCTGCCAGT GGCATAAGT  
8341 CGTGTCTTAC CGGGTTGGAC TCAAGACGAT AGTTACCGGA TAAGGCGCAG CGGTGGGGCT  
8401 GAACGGGGGG TTCGTGCACA CAGCCCAGCT TGGAGCGAAC GACCTACACC GAACTGAGAT  
8461 ACCTACAGCG TGAGCTATGA GAAAGCGCCA CGTTCCCGA AGGGAGAAAAG GCGGACAGGT  
8521 ATCCGGTAAG CGGCAGGGTC GGAACAGGAG AGCGCACGAG GGAGCTTCCA GGGGAAACG  
8581 CCTGGTATCT TTATAGTCCT GTCGGGTTTC GCCACCTCTG ACTTGAGCGT CGATTTTTGT  
8641 GATGCTCGTC AGGGGGGCGG AGCCTATGGA AAAACGCCAG CAACGCGGCC TTTTTACGGT  
8701 TCCTGGCCTT TTGCTGGCCT TTTGCTCACA TGTTCTTTCC TCGTTATCC CCTGATTCTG  
8761 TGGATAACCG TATTACCGCC TTTGAGTGAG CTGATACCGC TCGCCGACG CGAACGACCG  
8821 AGCGCAGCGA GTCAGTGAGC GAGGAAGCGG AAGAGCGCCC AATACGCAA CCGCTCTCC  
8881 CCGCGCGTTG GCCGATTCAT TAATGCAGCT GGCACGACAG GTTTCCCGAC TGGAAAGCGG  
8941 GCAGTGAGCG CAACGCAATT AATGTGAGTT AGCTCACTCA TTAGGCACCC CAGGCTTTAC  
9001 ACTTTATGCT TCCGGCTCGT ATGTTGTGTG GAATTGTGAG CGGATAACAA TTTACACAG  
9061 GAAACAGCTA TGACCATGAT TACGCCAAGC GCGCAATTA CCCTCACTAA AGGGAACAAA  
9121 AGCTGGAGCT GCAAGCTT
